# Supplementary material for: Characterization of an inorganic polymer coagulant and coagulation behavior for humic acid/algae-polluted water treatment: polymeric zinc–ferric–silicate–sulfate coagulant
Source: Royal Society of Chemistry journal article supplement (doi:10.1039/c7ra00232g), 2017-01-01
Supplement: c7ra00232g1.pdf [file c7ra00232g1.pdf]

Supplement materials

Characterization of an inorganic polymer coagulant and coagulation behavior for humic acid/algae-polluted water treatment: Polymeric zinc-ferric-silicate-sulfate coagulant

Yong Liao<sup>a, b</sup>, Xiaomin Tang<sup>a, c\*</sup>, Qingqing Yang<sup>a, b</sup>, Wei Chen<sup>a, b</sup>, Bingzhi Liu<sup>a, b</sup>,  
Chuanliang Zhao<sup>a, b</sup>, Jun Zhai<sup>a, b</sup>, Huaili Zheng<sup>a, b\*</sup>

<sup>a</sup> Key Laboratory of the Three Gorges Reservoir Region's Eco-Environment, State Ministry of Education, Chongqing University, Chongqing 400045, P.R. China

<sup>b</sup> National Centre for International Research of Low-carbon and Green Buildings, Chongqing University, Chongqing 400045, P.R. China

<sup>c</sup> Chongqing Key laboratory of Catalysis and Environmental new materials, College of Environment and Resources, Chongqing Technology and Business University, Chongqing 400067, P.R. China

\*Corresponding author: Key laboratory of the Three Gorges Reservoir Region's Eco-Environment, State Ministry of Education, Chongqing University, Chongqing, 400045, China. Tel & Fax: +86 023 65120827, Email: txmno1@126.com, zhl@cqu.edu.cn

**The following is included as additional supplementary materials for this paper:**

Page 3 The method of coagulation test about the removal of humic acid and turbidity from water using PZFSIS

Page 4 Fig. S1 The removal of turbidity and HA under different OH/Fe molar ratio

Page 5 Fig. S2 The removal of turbidity and HA under different Si/Fe molar ratio

Page 6 Fig. S3 XRD pattern of Poly- sulfate-ferric

Page 7 Fig. S4 SEM photographs of PFS

Page 8 Fig. S5 The removal rate of pollutants in the HA/algae-polluted water treatment by (a) PFS and (b) PAM

Page 9 Fig. S6 The effect of turbidity of water on the removal rate of turbidity and algae in the HA/algae-polluted water treatment

## **The method of coagulation test about the removal of humic acid and turbidity from water using PZFSiS**

Coagulation tests were carried out using a ZR4-6 six-paddle gang stirrer (Shenzhen Zhongrun Water Industry Technology and Development Co., Ltd, China). A certain dosage of PZFSiS (In Fe mass, mg/L) was added into the water samples which was prepared by the stock solution of HA and the stock suspension of kaolin. Then the water was mixed at a high speed of 300 rpm for 1 min and then at a low speed of 40 rpm for 10 min. After that, the water was settled for 30 min. Turbidity and UV<sub>254</sub> of treated water were measured using a 2100P turbidity meter (HACH, USA) and a TU-1900 ultraviolet/visible (UV/VIS) spectrophotometer. The removal rates of turbidity and HA are calculated using Eq. (1):

$$R=(1-T_f/T_i)\times 100\% \quad (1)$$

where R are the removal rate of turbidity and HA, respectively. Correspondingly, T<sub>i</sub> and T<sub>f</sub> are the initial and the final turbidity and UV<sub>254</sub>.

The results has been only represented in the Fig. S1 and Fig. S2.

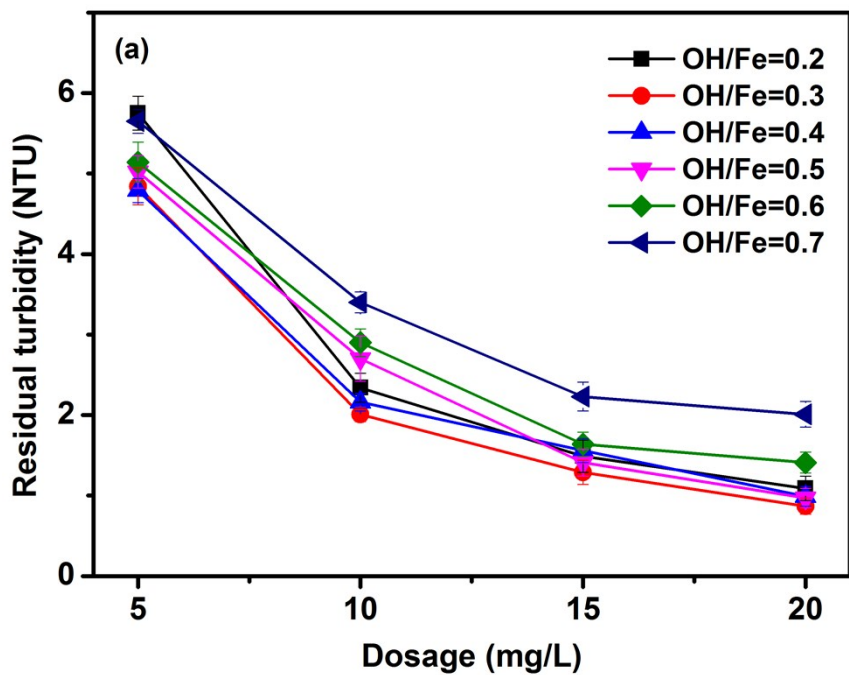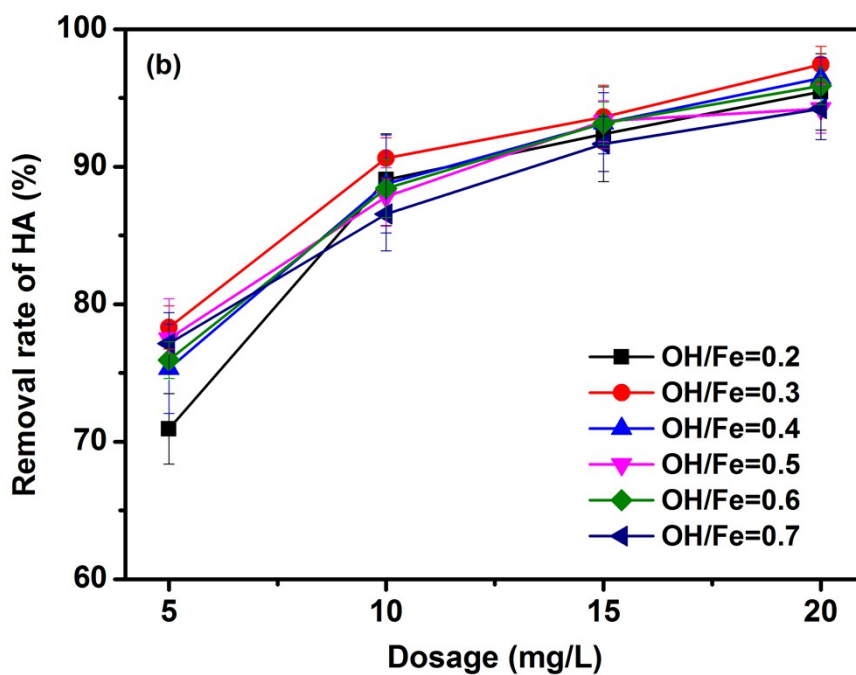

Fig. S1 The removal of turbidity and HA under different OH/Fe molar ratio

(coagulation condition was stated in page 3 of Supplement materials)

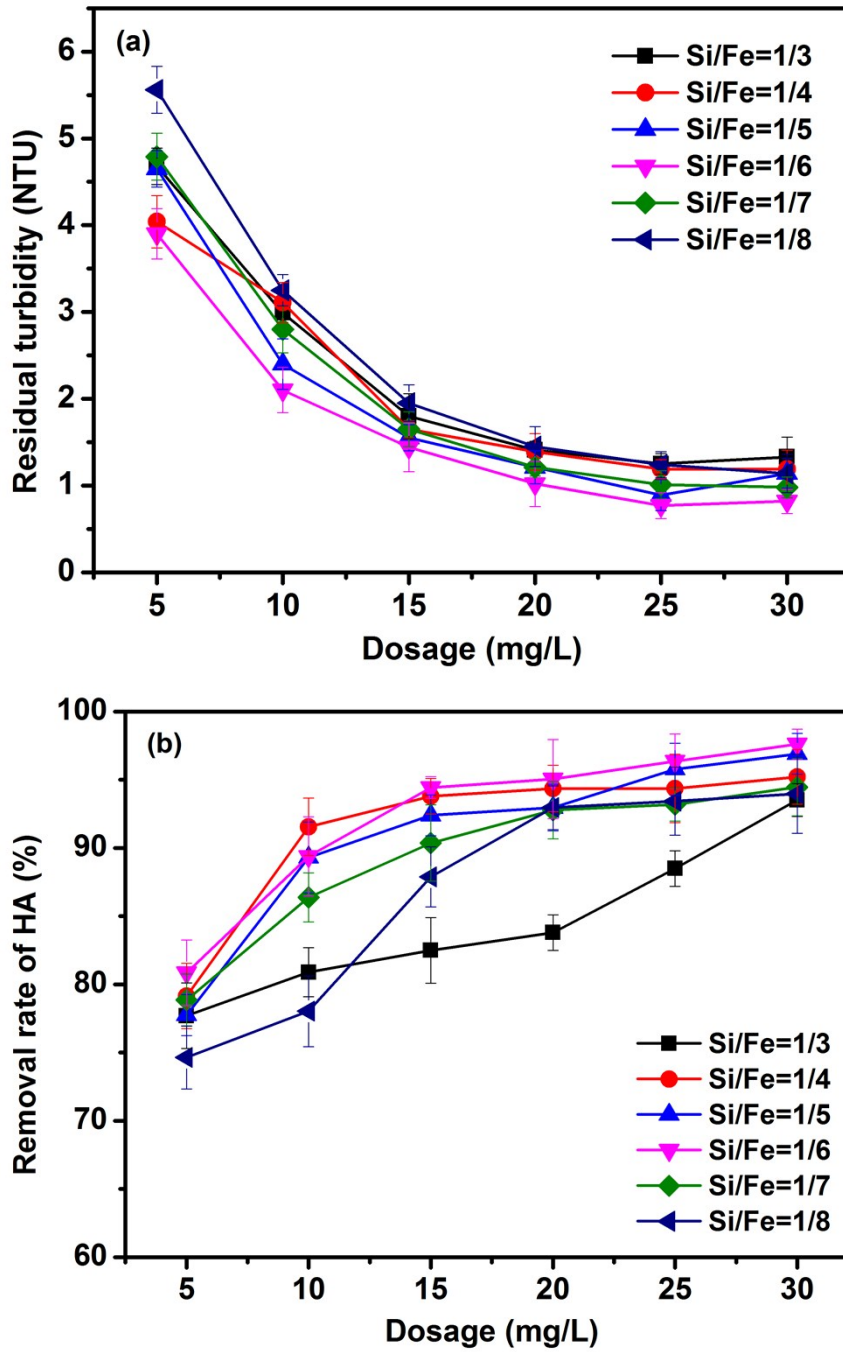

Fig. S2 The removal of turbidity and HA under different Si/Fe molar ratio (coagulation condition was stated in page 3 of Supplement materials)

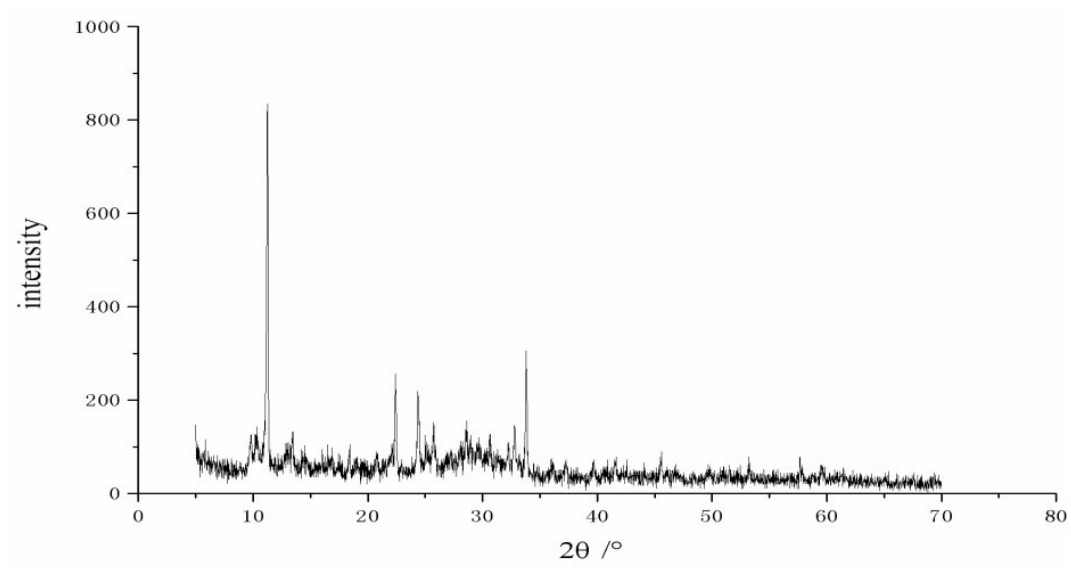

Fig. S3 XRD pattern of Poly- sulfate-ferric

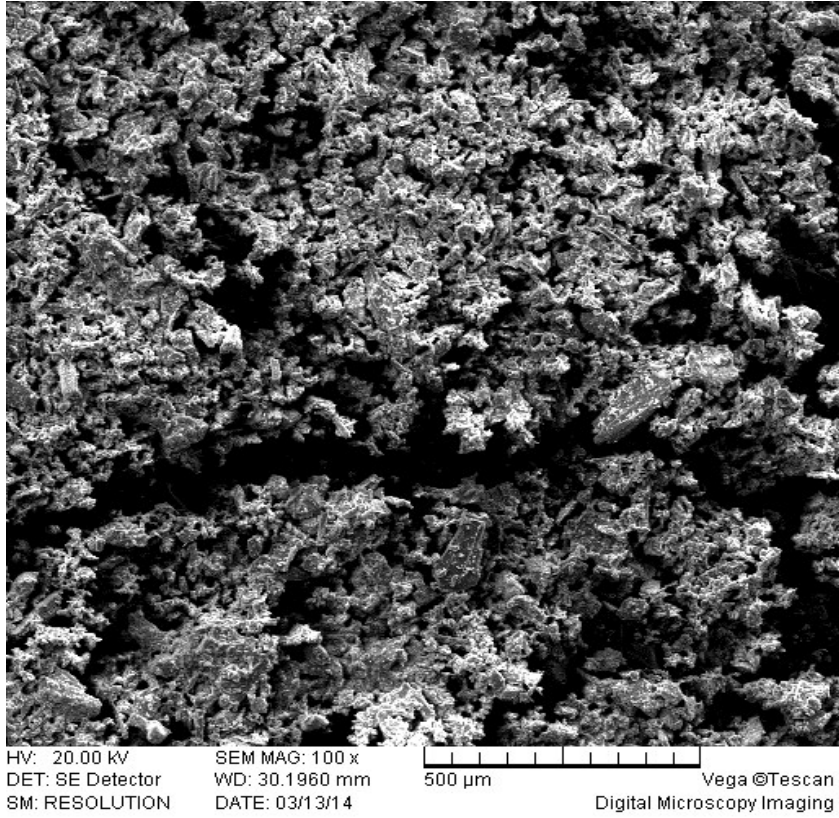

Fig. S4 SEM photographs of PFS

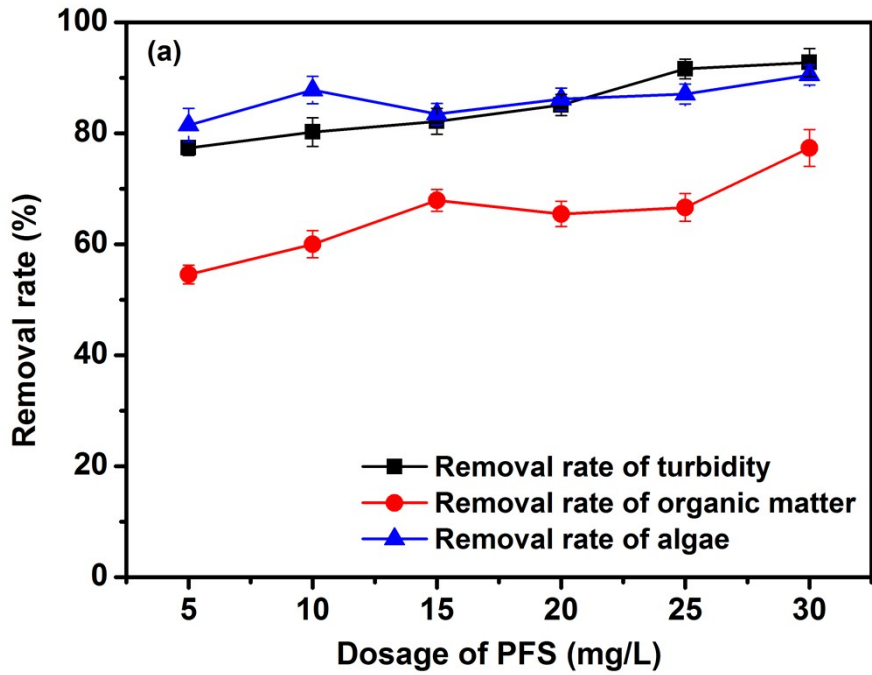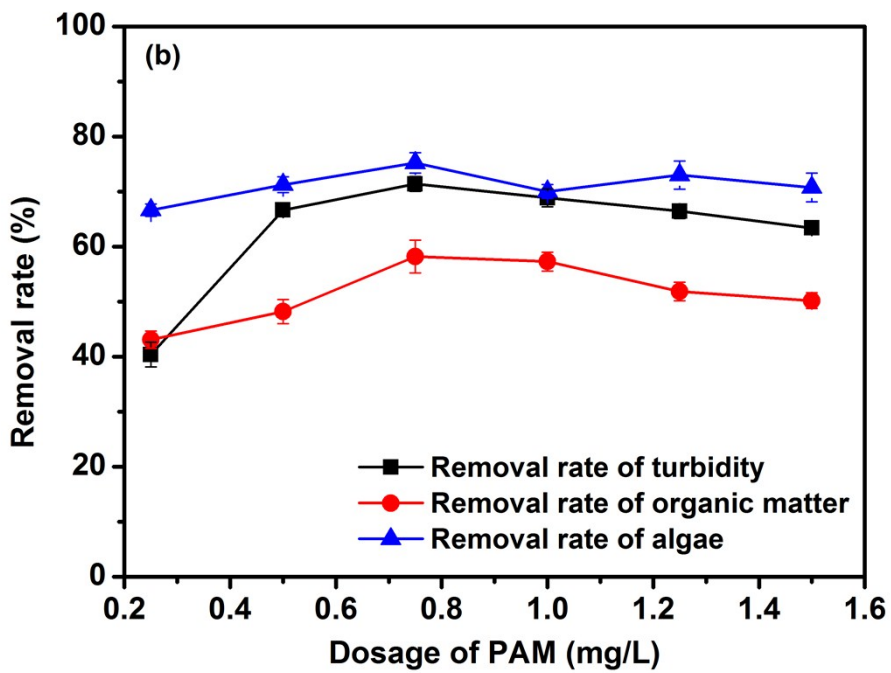

Fig. S5 The removal rate of pollutants in the HA/algae-polluted water treatment by (a) PFS and (b) PAM



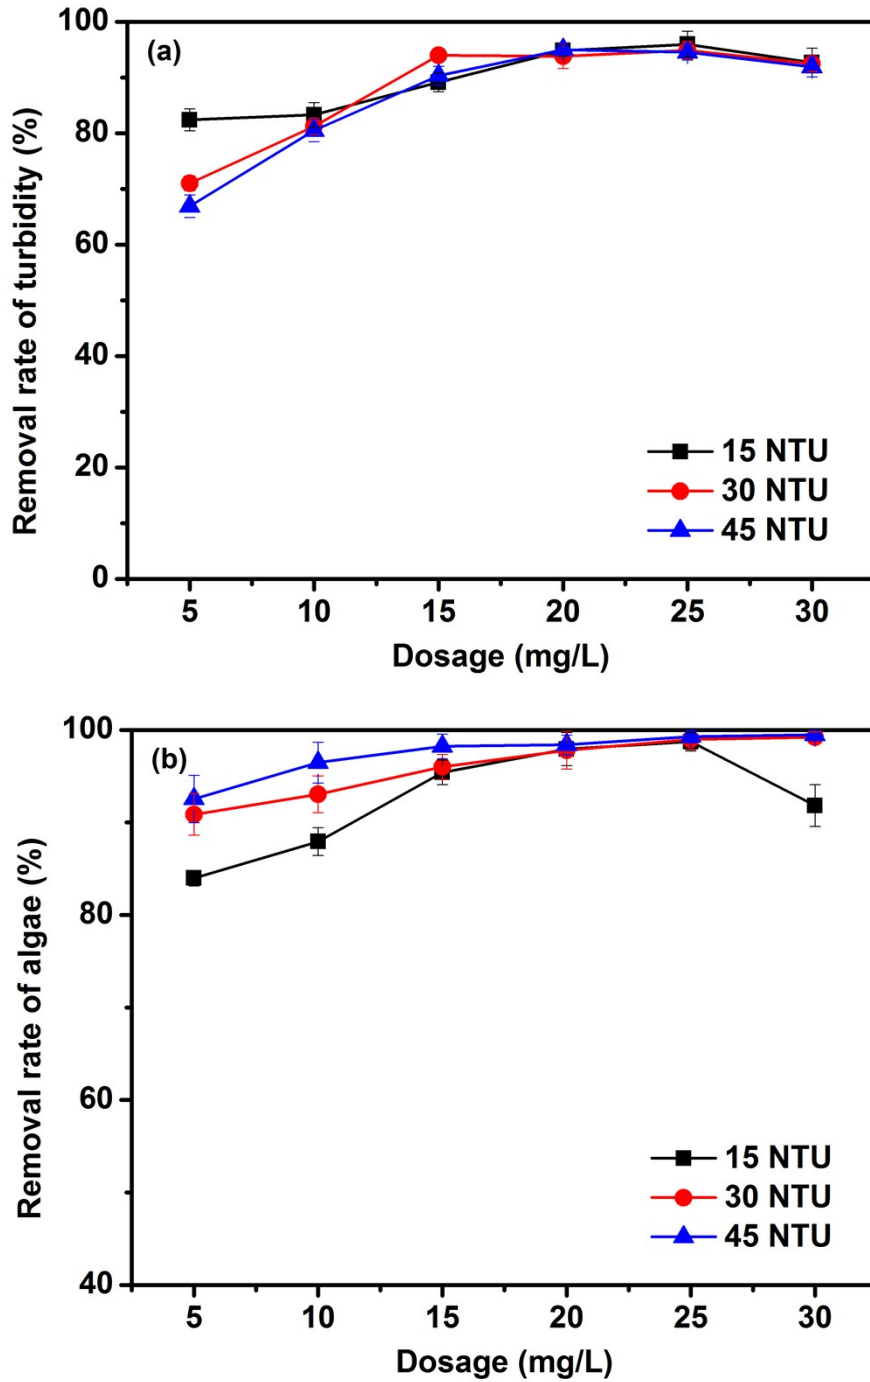

Fig. S6 The effect of turbidity of water on the removal rate of turbidity and algae in the HA/algae-polluted water treatment
